# Supplementary material
Source: publisher figshare collection journal article supplement (https://gsapubs.figshare.com/ndownloader/files/22409454)
Supplement: Supplementary file 1 [file 22409454]

Thomas, W.A., Astini, R.A., Mueller, P.A., and McClelland, W.C., 2015, Detrital-zircon geochronology and provenance of the Ocloyic synorogenic clastic wedge, and Ordovician accretion of the Argentine Precordillera terrane: *Geosphere*, v. 11, doi:10.1130/GES01212.1.

## Supplemental File. Geochronologic Methods and Data

### PRESENTATION

Zircons were separated from all samples by conventional density, size, and magnetic methods. Zircons were mounted in epoxy disks, polished to expose the grain interiors, and imaged using cathodoluminescence. These images were used to guide the analyses by either laser ablation inductively coupled plasma mass spectrometry or secondary ion mass spectrometry (SIMS: SHRIMP–RG, sensitive high resolution ion microprobe–reverse geometry). All ages mentioned in the text are listed in Tables DR1 and DR2, and are reported at the  $2\sigma$  level in the text. For ages  $<1000$  Ma, ages were calculated from the ratio of  $^{206}\text{Pb}/^{238}\text{U}$ , and discordance was based on the difference between the  $^{206}\text{Pb}/^{238}\text{U}$  and  $^{207}\text{Pb}/^{235}\text{U}$  ages. For ages  $>1000$  Ma, ages were calculated from the ratio of  $^{207}\text{Pb}/^{206}\text{Pb}$ , and discordance was based on the difference between the  $^{207}\text{Pb}/^{206}\text{Pb}$  and  $^{206}\text{Pb}/^{238}\text{U}$  ages. For data plotted from published reports, the same criteria were applied. All  $^{207}\text{Pb}/^{206}\text{Pb}$  ages reported or utilized in plots are  $<10\%$  discordant, and  $^{206}\text{Pb}/^{238}\text{U}$  ages are  $<5\%$  discordant.

Plotting of kernel density estimators (KDE) of the data for detrital zircons from sedimentary rocks used the *density plotter* java script of Vermeesch (2012), who provides further discussion of the utility of KDE plots. Figures 3, 4, and 6 through 10 display KDE plots overlain on data binned in histograms. KDE plots are similar to PDF (probability density function) plots; however, the KDE plots assign error to kernels of data rather than to individual samples to determine the distribution, producing a lesser tendency for low-error data to generate “peaks” in the KDE than in the PDF. The small circles below the  $x$ -axis in the KDE plots represent the values of each age used in the calculation of the distribution; the diameters of the circles are uniform and not related to the errors of the individual analyses they represent. Variable widths (age ranges) of the histogram bins reflect the sizes of the kernels calculated from the ages and  $1\sigma$  errors. Plotting of Tera-Wasserburg concordia diagrams for data from igneous rocks shown in Figure 5 used the ISOPLOT program of Ludwig (2008).

Most detrital zircon analyses reported herein were completed at the University of Florida using a 213 nm Nd-YAG laser ablation system coupled to a Nu Plasma multi-collector ICP mass spectrometer. Details of measurement protocols are in Mueller et al. (2008). Detrital zircons from samples 10.LV-LP-1.3, 12.LV-LPL-4, and 17.03–346 were analyzed for U/Pb using a New Wave UP-213 (213nm, Nd:YAG) laser system coupled to a ThermoFinnigan Element2 ICP-MS instrument at Washington State University. The U/Pb analytical routine and data reduction followed Chang et al. (2006). Standards Peixe (564 Ma; Dickinson and Gehrels, 2003), FC-1 (1099 Ma; Paces and Miller, 1993), and R33 (421 Ma; Black et al., 2004; Mattinson, 2010) were used to determine fractionation factors for the  $^{206}\text{Pb}/^{238}\text{U}$  and  $^{207}\text{Pb}/^{206}\text{Pb}$  ratios.

Zircons from two igneous clasts (samples 14.LV-LP-4.3 and 15.LV-LV-2.1) were analyzed at the U.S. Geological Survey–Stanford University SHRIMP-RG (sensitive high resolution ion microprobe–reverse geometry) facility (Table DR2). The U/Pb analytical routine followed Barth and Wooden (2006), and data reduction used Ludwig (2001). Fractionation corrections were calibrated by replicate analysis of the natural zircon standard R33 (421 Ma; Black et al., 2004; Mattinson, 2010), and U concentrations were calibrated with CZ3 (550 ppm U; Pidgeon et al., 1994). Analysis occurred during two separate sessions on two different mounts, with  $2\sigma$  calibration errors for the R33  $^{206}\text{Pb}/^{238}\text{U}$  ratios of 0.53% and 0.54%.

#### **REFERENCES CITED IN SUPPLEMENTAL FILE**

- Barth, A.P., and Wooden, J.L., 2006, Timing of magmatism following initial convergence at a passive margin, southwestern US Cordillera, and ages of lower crustal magma sources: *The Journal of Geology*, v. 114, p. 231–245, doi:10.1086/499573.
- Black, L.P., Kamo, S.L., Allen, C.M., Davis, D.W., Aleinikoff, J.N., Valley, J.W., Mundil, R., Campbell, I.H., Korsch, R.J., Williams, I.S., and Foudoulis, C., 2004, Improved  $^{206}\text{Pb}/^{238}\text{U}$  microprobe geochronology by the monitoring of a trace-element-related matrix effect; SHRIMP, ID-TIMS, ELA-ICP-MS and oxygen isotope documentation for a series of zircon standards: *Chemical Geology*, v. 205, p. 115–140, doi:10.1016/j.chemgeo.2004.01.003.
- Chang, Z., Vervoort, J.D., McClelland, W.C., and Knaack, C., 2006, U-Pb dating of zircon by LAICP-MS: *Geochemistry Geophysics Geosystems*, v. 7, Q05009, doi:10.1029/2005GC001100.

- Dickinson, W., and Gehrels, G., 2003, U-Pb ages of detrital zircons from Permian and Jurassic eolian sandstones of the Colorado Plateau, USA: Paleogeographic implications: *Sedimentary Geology*, v. 163, p. 29–66, doi:10.1016/S0037-0738(03)00158-1.
- Ludwig, K.R., 2001, Squid version 1.13b: A user's manual: Berkeley, USA, Berkeley Geochronology Center Special Publication, v. 2, p. 1–22.
- Ludwig, K., 2008, Isoplot 3.6: Berkeley Geochronology Center Special Publication 4, 77 p.
- Mattinson, J.M., 2010, Analysis of the relative decay constants of  $^{235}\text{U}$  and  $^{238}\text{U}$  by multi-step CA-TIMS measurements of closed-system natural zircon samples: *Chemical Geology*, v. 275, p. 186–198, doi:10.1016/j.chemgeo.2010.05.007.
- Mueller, P., Kamenov, G., Heatherington, A., and Richards, J., 2008, Crustal evolution in the southern Appalachian orogen: Evidence from Hf isotopes in detrital zircons: *The Journal of Geology*, v. 116, p. 414–422, doi:10.1086/589311.
- Paces, J.B., and Miller, J.D., Jr., 1993, Precise U–Pb ages of Duluth complex and related mafic intrusions, northeastern Minnesota: Geochronological insights to physical, petrogenetic, paleomagnetic, and tectonomagmatic processes associated with the 1.1 Ga midcontinent rift system: *Journal of Geophysical Research*, v. 98, B8, p. 13,997–14,014, doi:10.1029/93JB01159.
- Pidgeon, R.T., Furfaro, D., Kennedy, A.K., Nemchin, A.A., and van Bronswijk, W., 1994, Calibration of zircon standards for the Curtin SHRIMP II: U.S. Geological Survey Circular 1107, 251 p.
- Stacey, J.S., and Kramers, J.D., 1975, Approximation of terrestrial lead evolution by a two-stage model: *Earth and Planetary Science Letters*, v. 26, p. 207–221, doi:10.1016/0012-821X(75)90088-6.
- Vermeesch, P., 2012, On the visualization of detrital age distributions: *Chemical Geology*, v. 312–313, p. 190–194, doi:10.1016/j.chemgeo.2012.04.021.
- Williams, I.S., 1998, U-Pb by ion microprobe, *in* McKibben, M. A., Shanks, W. C., and Ridley, W. I., eds., *Applications of microanalytical techniques to understanding mineralizing processes*: Society of Economic Geologists, *Reviews in Economic Geology*, v. 7, p. 1–35.
